# Supplementary material for: Efficacy and Safety of Lumateperone for Treatment of Schizophrenia: A Randomized Clinical Trial
Source: PubMed Central journal article supplement — JAMA Psychiatry. 2020 Jan 8;77(4):349–58. doi: 10.1001/jamapsychiatry.2019.4379 (PMC6990963; doi:10.1001/jamapsychiatry.2019.4379), 2020-01-08
Supplement: jamapsychiatry-77-349-s003.pdf [file jamapsychiatry-77-349-s003.pdf]

## **Data Sharing Statement**

Correll. Efficacy and Safety of Lumateperone for Treatment of Schizophrenia. *JAMA Psychiatry*. Published January 08, 2020. 10.1001/jamapsychiatry.2019.4379

### **Data**

**Data available:** No
